# Supplementary material for: Electronic spectroscopy of differential mobility-selected prototropic isomers of protonated para-aminobenzoic acid
Source: Royal Society of Chemistry journal article supplement (doi:10.1039/d1cp02120f), 2021-01-01
Supplement: d1cp02120f1.pdf [file d1cp02120f1.pdf]

Electronic Supplementary Information for:  
“Electronic Spectroscopy of Differential Mobility-selected  
Prototropic Isomers of Protonated Para-Aminobenzoic Acid”

Neville J. A. Coughlan,<sup>‡,a,e</sup> Weiqiang Fu,<sup>‡,a</sup> J. Larry Campbell,<sup>a,b,d</sup> Mircea Guna,<sup>c</sup> Bradley  
B. Schneider,<sup>c</sup> J. C. Yves Le Blanc,<sup>c</sup> and W. Scott Hopkins<sup>\*a,d,e,f</sup>

<sup>a</sup> Department of Chemistry, University of Waterloo, 200 University Avenue West, Waterloo, Ontario, N2L 3G1,  
Canada. E-mail: shopkins@uwaterloo.ca

<sup>b</sup> Bedrock Scientific Inc., Milton, Ontario, Canada

<sup>c</sup> SCIEX, Four Valley Drive, Concord, Ontario, L4K 4V8, Canada

<sup>d</sup> WaterMine Innovation, Waterloo, Ontario, Canada

<sup>e</sup> Waterloo Institute for Nanotechnology, University of Waterloo, 200 University Avenue West, Waterloo, Ontario  
N2L 3G1, Canada

<sup>f</sup> Centre for Eye and Vision Research, Hong Kong Science Park, New Territories, Hong Kong

<sup>‡</sup> These authors contributed equally to this work

\*email:shopkins@uwaterloo.ca

## S1 Experimental apparatus

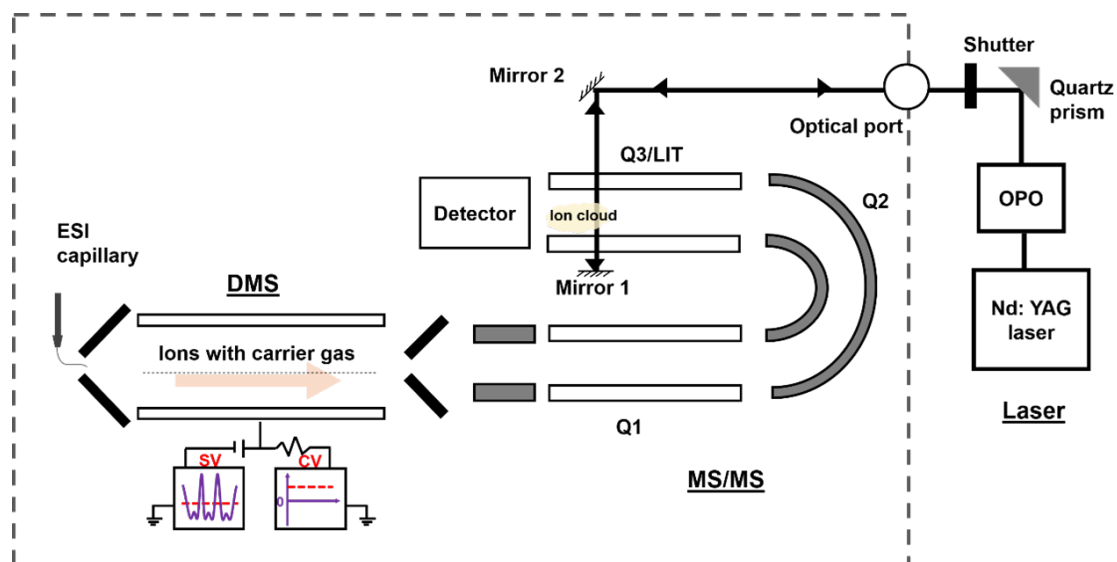

Figure S1: A schematic illustration of the experimental apparatus used for DMS-MS experiments and for photodissociation experiments presented in the main article.

As shown in Figure S1, electrosprayed ions traverse through the DMS cell in the same direction as the carrier gas ( $N_2$ , 1 atm.) under the influence of an applied electric field. The electric field consists of an asymmetric radiofrequency potential (separation voltage, SV), superimposed on top of a DC potential (compensation voltage, CV); for a given SV above the high-field limit, every ion will elute at a unique CV value required to correct its trajectory toward the exit orifice. The DMS cell is housed in front of the entrance to a triple quadrupole mass spectrometer. DMS-selected ions are mass-selected in the first quadrupole (Q1), pass through a second quadrupole in RF-only mode (Q2), and are accumulated in the third quadrupole (Q3). Here, DMS-gated, mass-selected ions are irradiated by the output of a tunable Nd:YAG-pumped OPO. Ions with electronic transition energies resonant with the incoming light can undergo photodissociation inside Q3. Parent and fragment ions are ejected from the trap following a mass-selective axial ejection protocol before detection at a channeltron ion detector.

## S2 Photodissociation action spectra

See below for spectroscopy data cited in the main text.

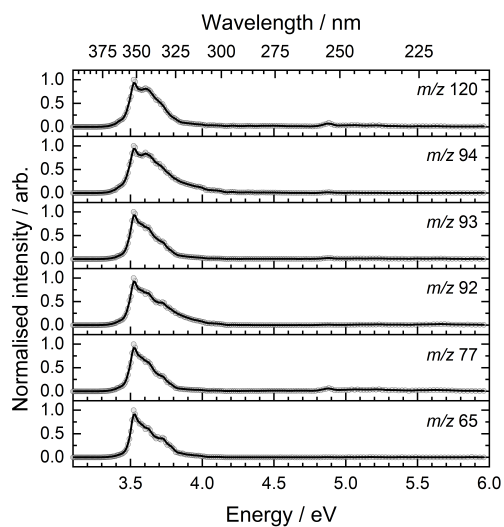

Figure S2: UVPD spectra for individual fragmentation channels corresponding to photodissociation of the O-protonated isomer in response to UV photon absorption.

### S3 DMS data

See below for differential mobility spectrometry data cited in the main text.

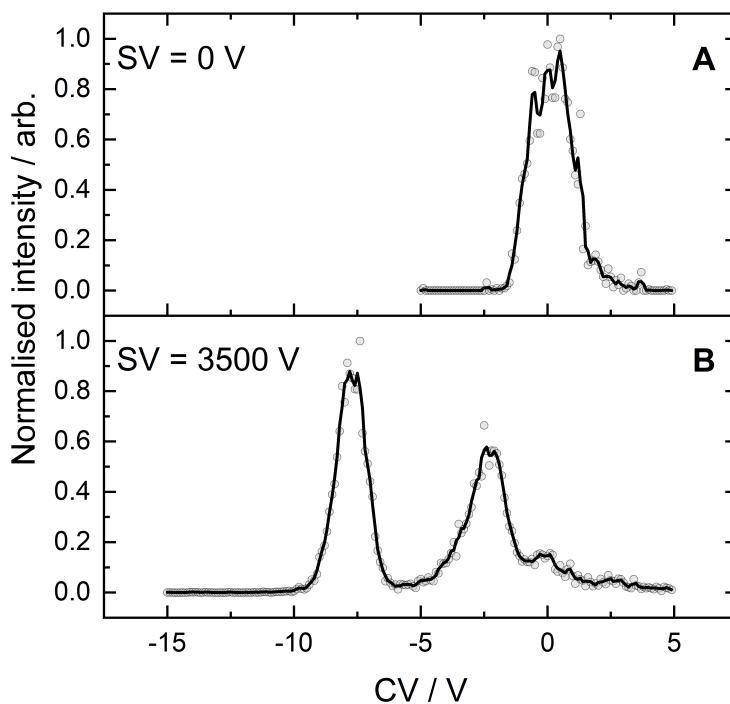

Figure S3: Ionograms for electrosprayed PABA dissolved in H<sub>2</sub>O. A: SV = 0 V; B: SV = 3500 V. The raw data (open circles) are overlaid with a 3-point adjacent-average smoothed curve.

### S4 Calculated transition orbitals

Figure S4 & Figure S5 below show the calculated molecular orbitals with the highest contributions for the first three transitions for both the O- and N- protonated isomers of protonated para-aminobenzoic acid. In all cases the transitions are predominantly  $\pi$ - $\pi^*$  character.

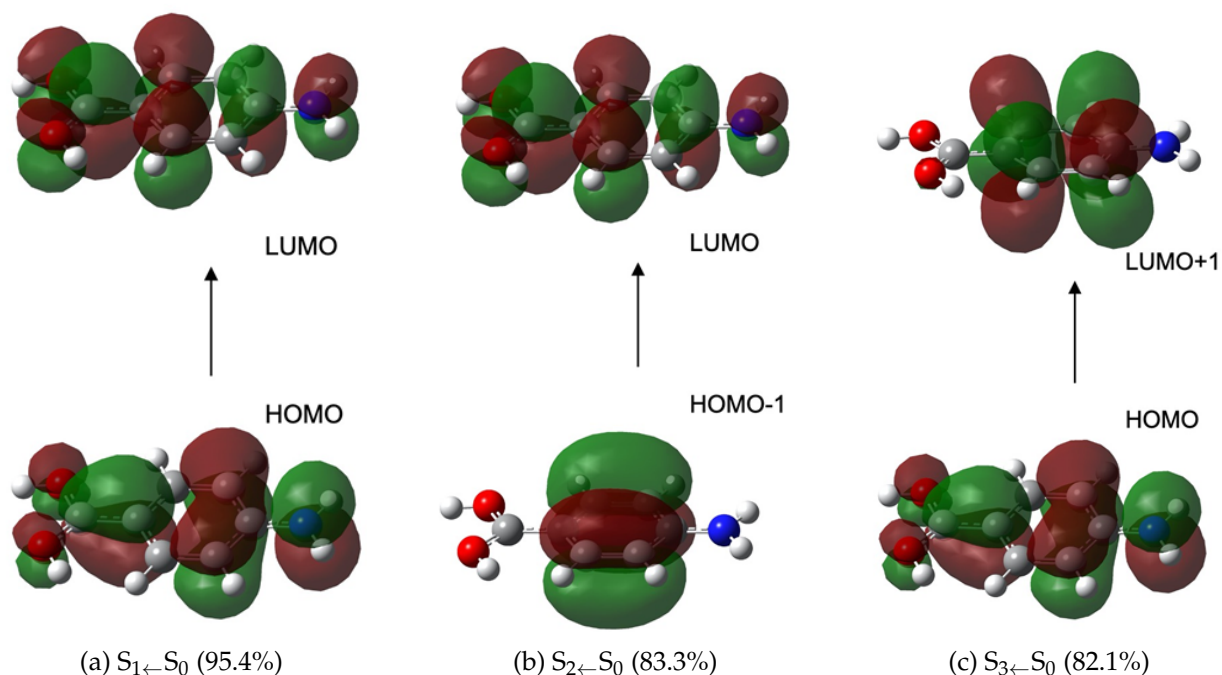

Figure S4: The calculated TD-DFT molecular orbitals for the O-protonated isomer for corresponding to electronic transitions from the ground state ( $S_0$ ) to the  $n^{\text{th}}$  excited state, with percentage contributions shown in parentheses.

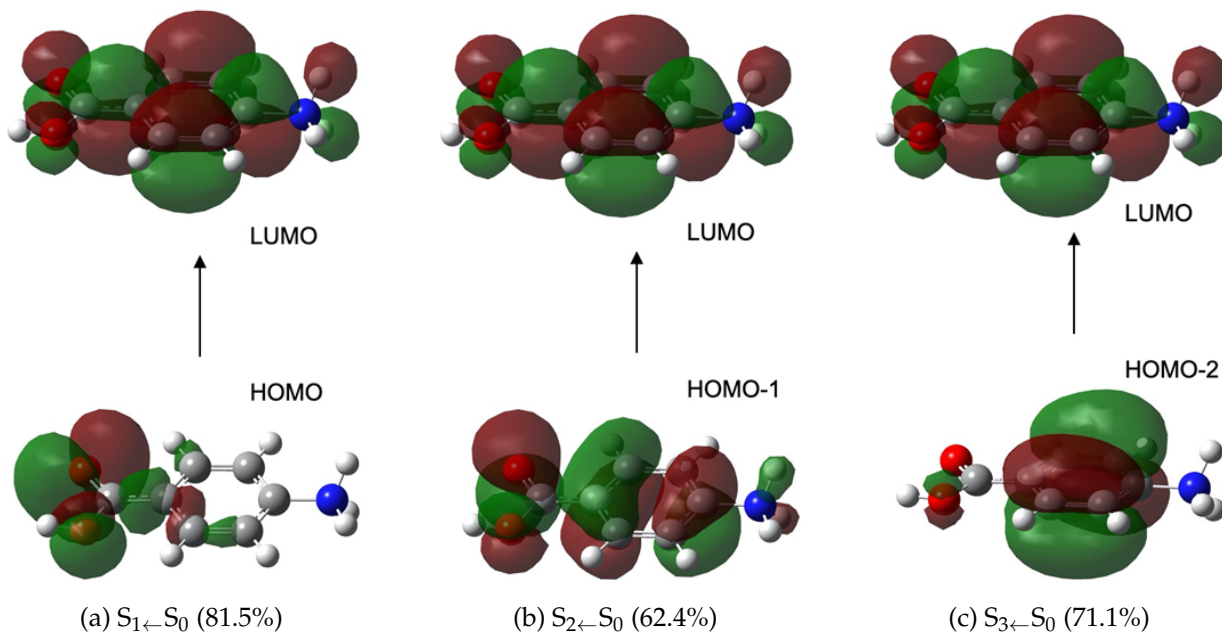

Figure S5: The calculated TD-DFT molecular orbitals for the N-protonated isomer for corresponding to electronic transitions from the ground state ( $S_0$ ) to the  $n^{\text{th}}$  excited state, with percentage contributions shown in parentheses.
